# Supplementary material for: Differential Immunomodulatory Effects of Head and Neck Cancer-Derived Exosomes on B Cells in the Presence of ATP
Source: MDPI journal article supplement (doi:10.3390/ijms232214446), 2022-11-21
Supplement: s1 [file s1]

# Supplementary Figures

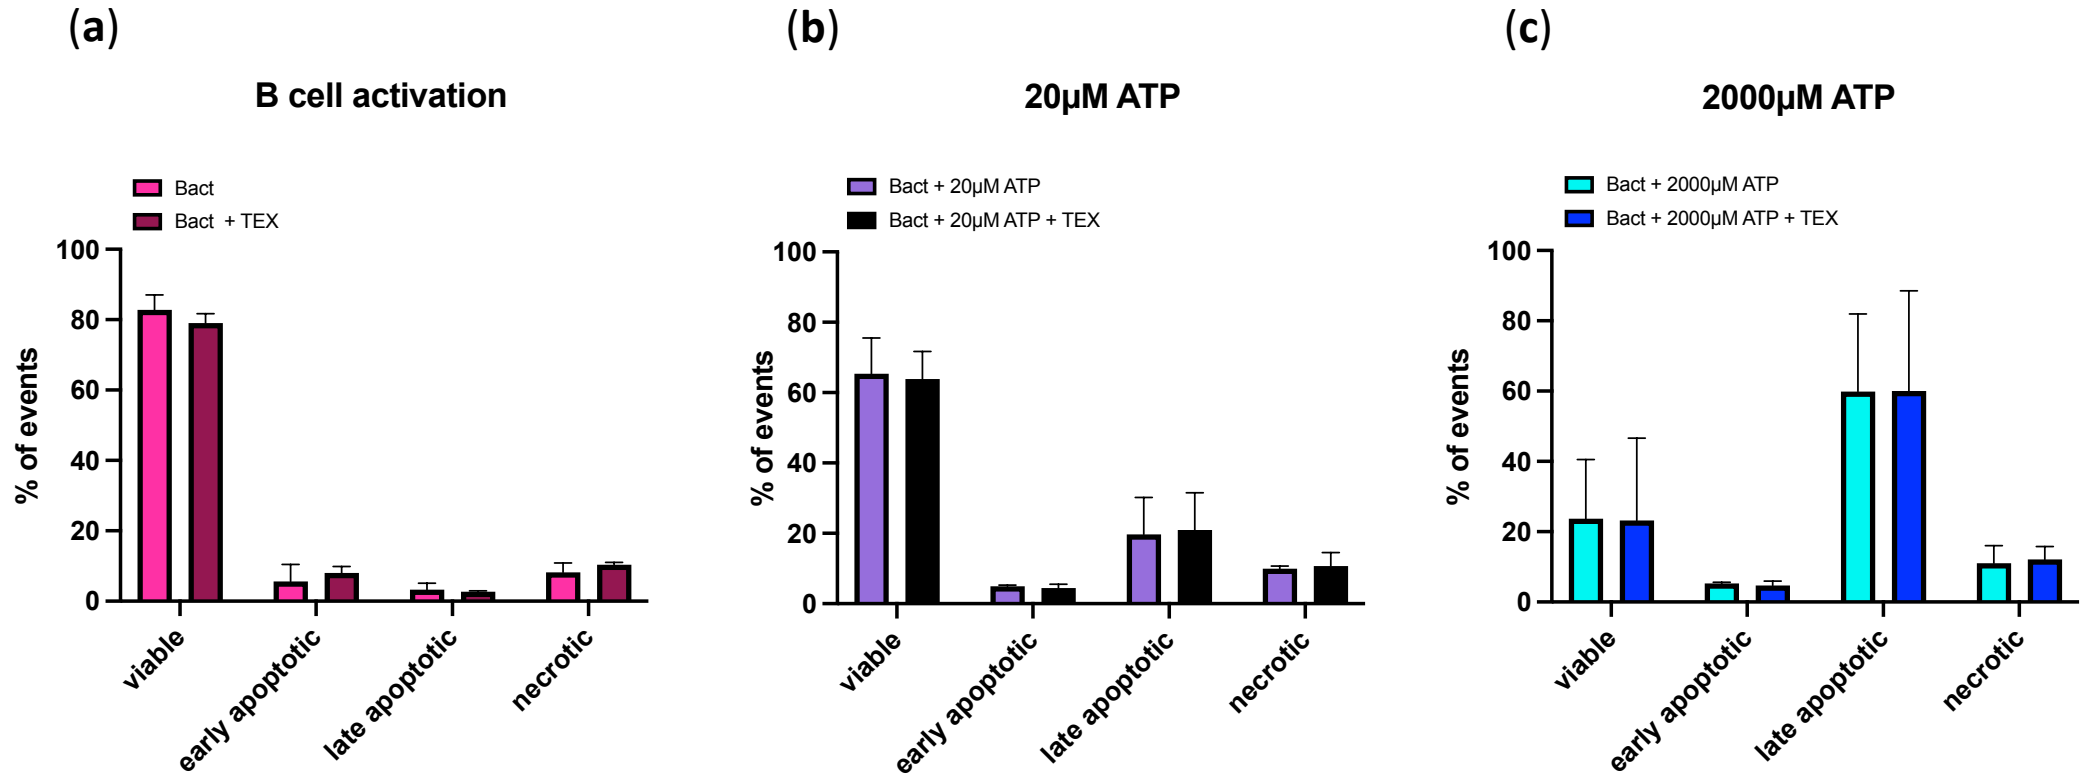

**Figure S1.** Bar charts showing the effect of TEX on cell death in activated B cells (Bact) with or without ATP based on flow cytometry data of Annexin V and Propidium Iodide (PI) staining as seen in figure 5a. **(a)** Bar charts showing no significant changes by TEX on the rates of viable or dead cells in Bact. **(b)** Bar charts showing no significant changes by TEX on the rates of viable or dead cells in Bact co-incubated with 20μM ATP. **(c)** Bar charts showing no significant changes by TEX on the rates of viable or dead cells in Bact co-incubated with 2000μM ATP. Statistical significance was determined using a 2-way ANOVA Tukey's multiple comparisons test. The mean of four independent experiments with standard deviation are presented.

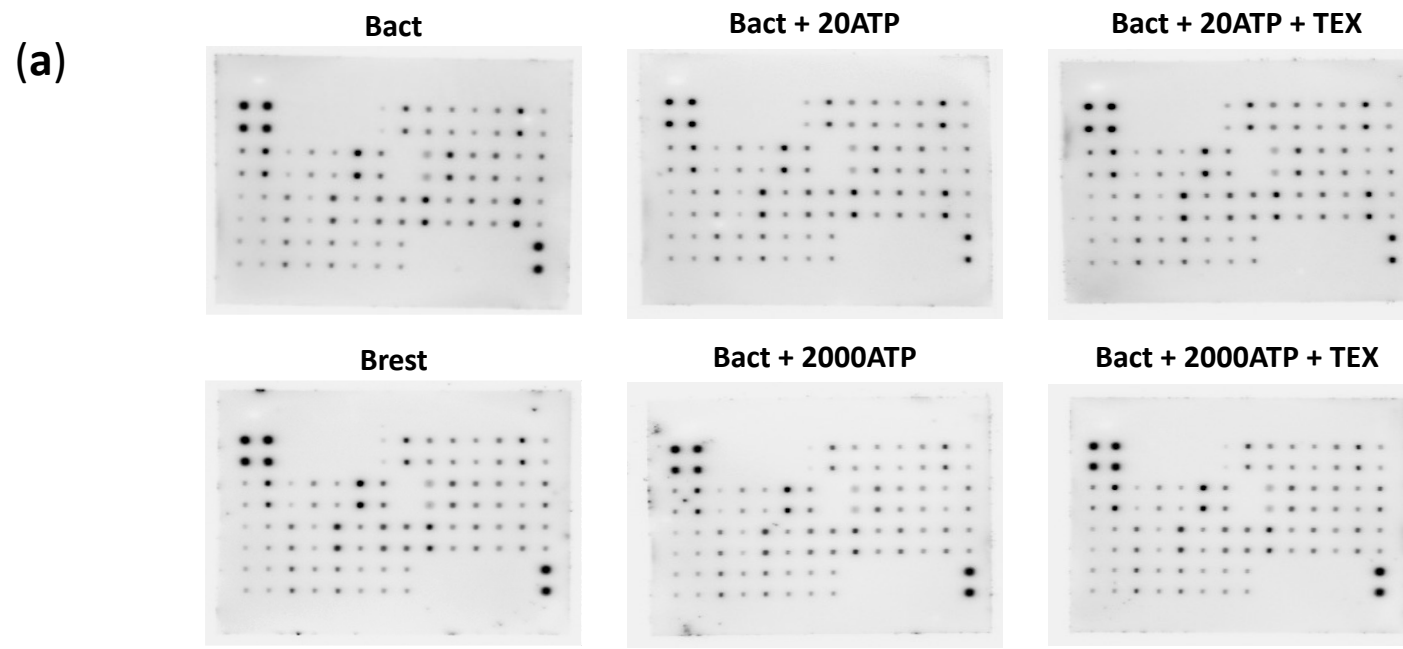

**(b)**

|         |               |              |          |          |          |          |          |       |       |       |      |           |           |
|---------|---------------|--------------|----------|----------|----------|----------|----------|-------|-------|-------|------|-----------|-----------|
| Pos     | Pos           | Neg          | Neg      | BLANK    | BLANK    | Bad      | Bax      | Bcl-2 | Bcl-w | BID   | BIM  | Caspase 3 | Caspase 8 |
| Pos     | Pos           | Neg          | Neg      | BLANK    | BLANK    | Bad      | Bax      | Bcl-2 | Bcl-w | BID   | BIM  | Caspase 3 | Caspase 8 |
| CD40    | CD40L         | clAP-2       | cytoC    | DR6      | Fas      | FasL     | BLANK    | HSP27 | HSP60 | HSP70 | HTRA | IGF-I     | IGF-II    |
| CD40    | CD40L         | clAP-2       | cytoC    | DR6      | Fas      | FasL     | BLANK    | HSP27 | HSP60 | HSP70 | HTRA | IGF-I     | IGF-II    |
| IGFBP-1 | IGFBP-2       | IGFBP-3      | IGFBP-4  | IGFBP-5  | IGFBP-6  | IGF-1sR  | Survivin | p21   | p27   | p53   | SMAC | Survivin  | sTNF-R1   |
| IGFBP-1 | IGFBP-2       | IGFBP-3      | IGFBP-4  | IGFBP-5  | IGFBP-6  | IGF-1sR  | Survivin | p21   | p27   | p53   | SMAC | Survivin  | sTNF-R1   |
| sTNF-R2 | TNF- $\alpha$ | TNF- $\beta$ | TRAILR-1 | TRAILR-2 | TRAILR-3 | TRAILR-4 | XIAP     | BLANK | BLANK | Neg   | Neg  | Neg       | Pos       |
| sTNF-R2 | TNF- $\alpha$ | TNF- $\beta$ | TRAILR-1 | TRAILR-2 | TRAILR-3 | TRAILR-4 | XIAP     | BLANK | BLANK | Neg   | Neg  | Neg       | Pos       |

**Figure S2.** Dot blots of 43 apoptosis-associated proteins and controls. **(a)** Representative apoptosis dot blot results of the experiments with isolated B cells in six different conditions (Brest: resting B cells; Bact: activated B cells; Bact with 20 $\mu$ M or 2000 $\mu$ M ATP, and Bact with 20 $\mu$ M or 2000 $\mu$ M ATP and TEX). **(b)** Array map for the 43 apoptosis markers and controls.

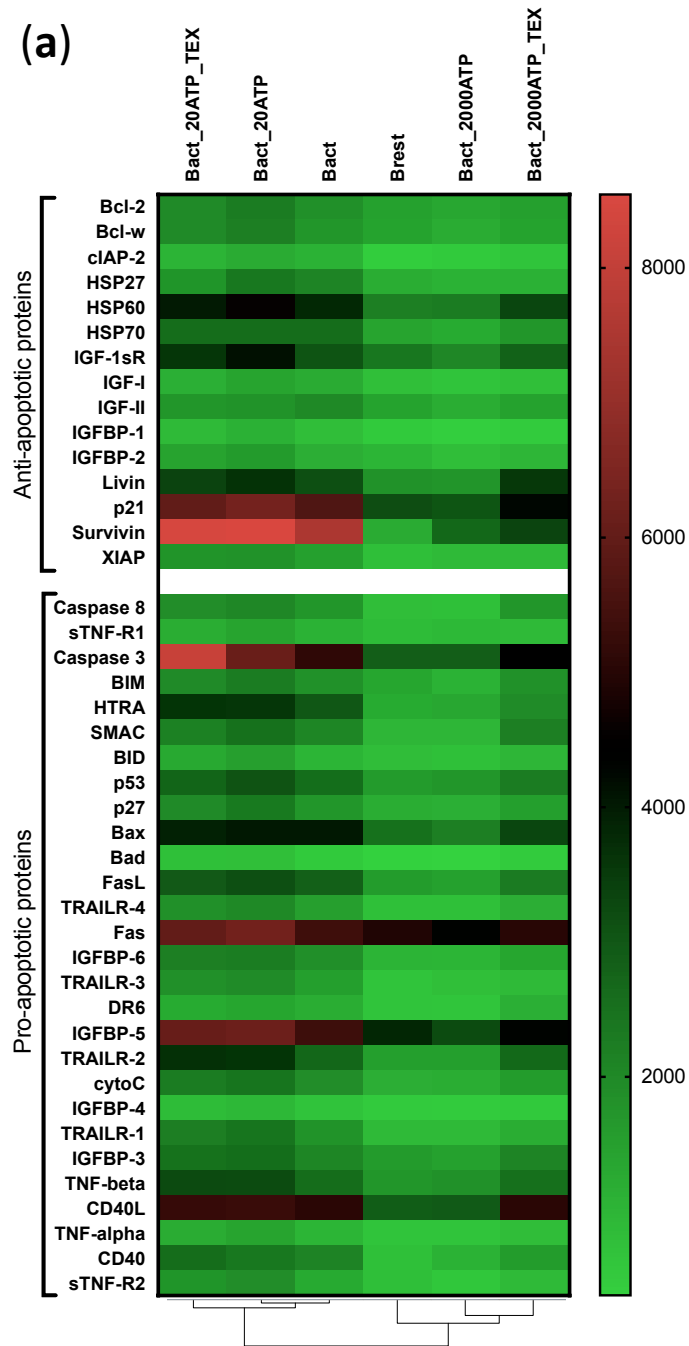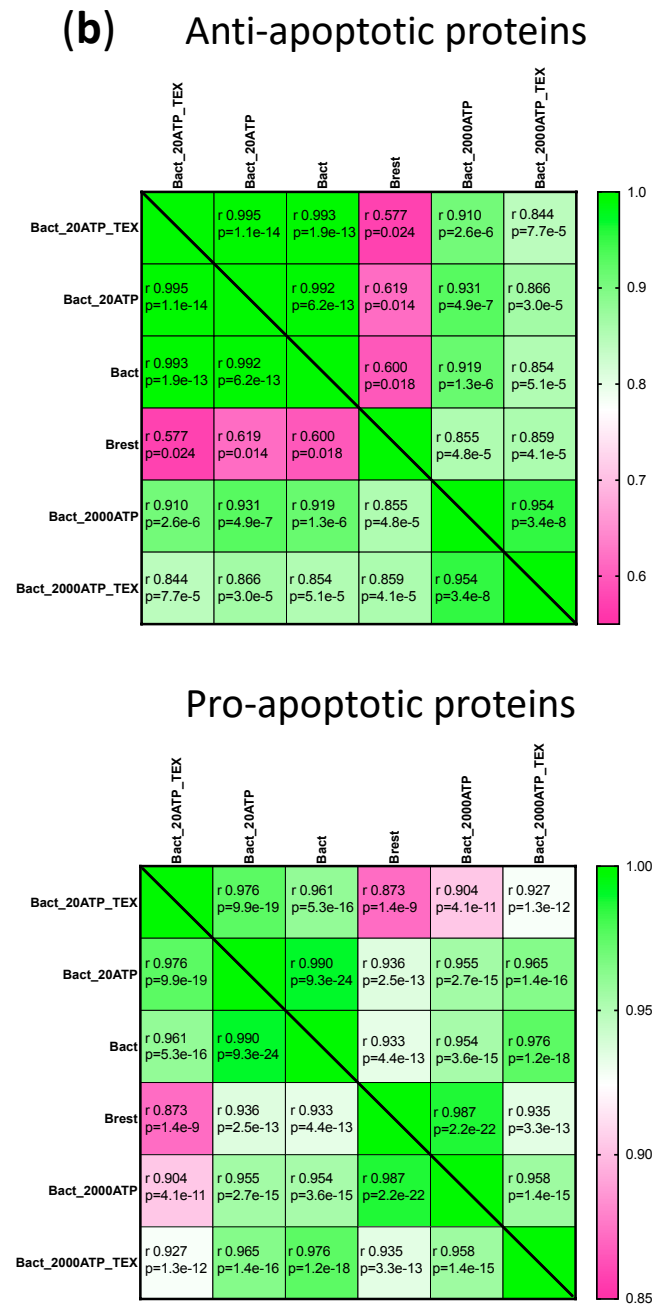

**Figure S3.** Heatmaps showing the expression of the 43 apoptosis-associated proteins separated as pro- and anti-apoptotic proteins as a mean of four independent experiments in isolated B cells in six different conditions (Brest: resting B cells; Bact: activated B cells; Bact with 20 $\mu$ M or 2000 $\mu$ M ATP, and Bact with 20 $\mu$ M or 2000 $\mu$ M ATP and TEX). **(a)** Semi-supervised clustering uncovered 2 groups: Bact and Bact with 20 $\mu$ M ATP with or without TEX versus Brest and Bact with 2000 $\mu$ M ATP with or without TEX. Distance measuring method: Pearson. Clustering method: Average Linkage. **(b)** Heatmap showing the protein expression as an overall mean. Differences between each group were highly significant. For the anti-apoptotic proteins, the biggest differences were seen between Brest and the Bact or Bact + 20ATP +/- TEX. For the pro-apoptotic proteins, these differences were less pronounced. Instead, the differences were greater between Bact + 20ATP + TEX and Brest or Bact + 2000ATP +/- TEX. The matrix of the anti-apoptotic proteins showed lower r-values than the one of the pro-apoptotic (see legend bar). Pearson correlation matrix with their respective r-values and statistical significances (p-values).

## Apoptotic effect of TEX in low ATP concentration

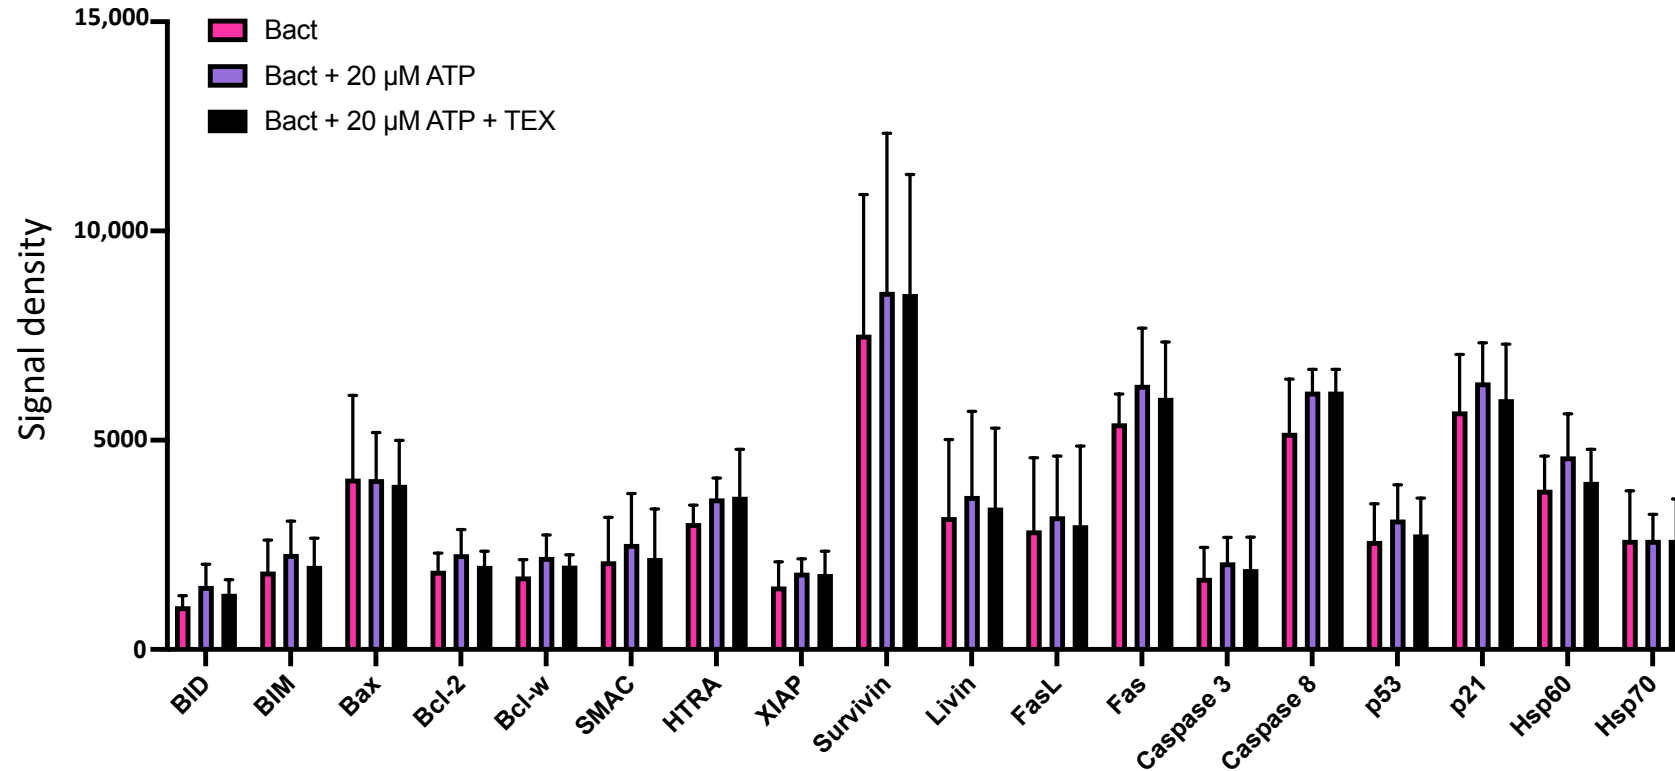

**Figure S4.** Bar charts comparing the expression of 18 of the pro- and anti-apoptotic proteins shown in figure 6b in activated B cells (Bact), Bact + 20 $\mu$ M ATP and Bact + 20 $\mu$ M ATP + TEX. No significant changes detected. Significance determined by a 2-way ANOVA Tukey's multiple comparisons test.

(a)

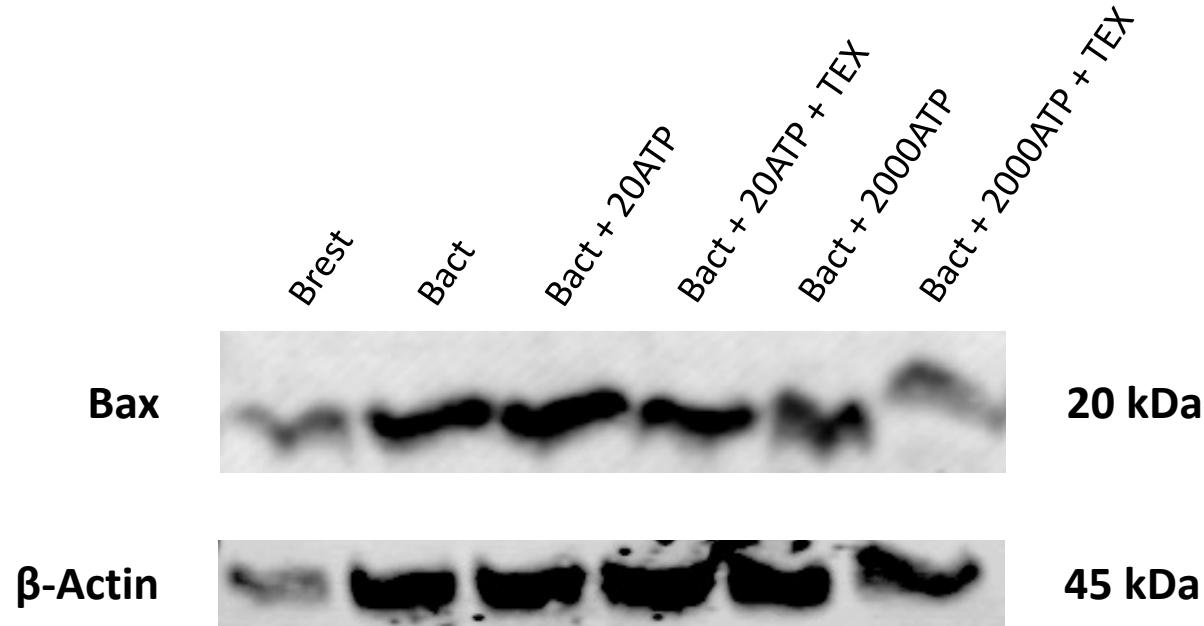

(b)

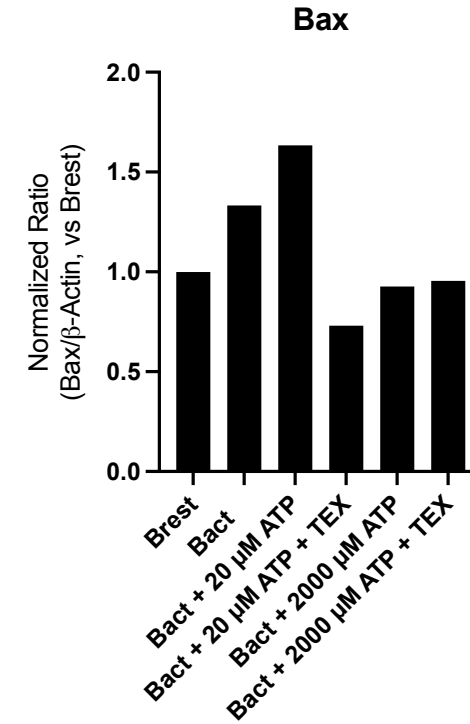

**Figure S5. (a)** Western Blot analysis of the pro-apoptotic protein Bax in resting B cells (Brest) or activated B cells (Bact), including different culture interventions. **(b)** Quantification of western blot analysis of Bax in Brest or Bact, including different culture interventions. Activation of B cells increased Bax expression. Low amounts of ATP (20 $\mu$ M ATP) further increased Bax expression. However, high amounts of ATP (2000 $\mu$ M ATP) strongly decreased Bax expression. Whereas TEX addition to low amounts of ATP starkly decreased Bax expression, TEX addition to high amounts of ATP maintained expression levels with a possible minor increase.

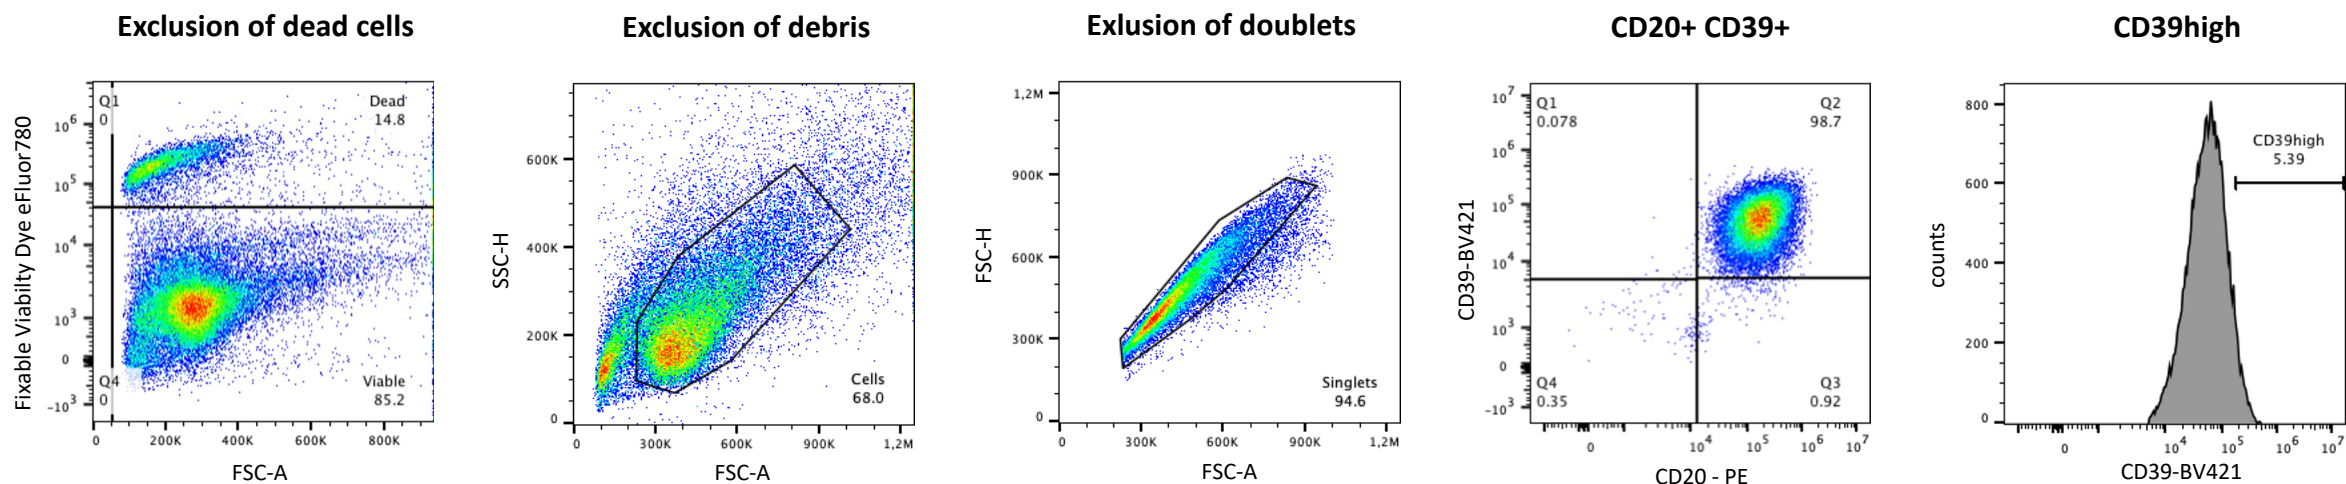

**Figure S6.** Flow cytometry gating strategy for CD39+ B cells and CD39high B cell subset in anti-CD19 magnetically separated B cells. CD39high B cells were defined as the 5% of CD39+ B cells with the highest fluorescence intensity for CD39 following B cell activation [22].
